# Supplementary material
Source: bioRxiv or medRxiv preprint supplement (https://www.biorxiv.org/highwire/filestream/25686/field_highwire_adjunct_files/14/077701-4.pdf)

DPP-SCW signaling pathway  
 EGFR Downregulation  
 Grb2 Events In EGFR Signaling // Shc Events In EGFR ...  
 PLK3 Signaling Events  
 EGFR-dependent Endothelin Signaling Events  
 Map Kinase Inactivation Of Smrt Corepressor  
 Signaling By EGFR  
 Activation Of NOXA And Translocation To Mitochondr ...  
 Activation Of PUMA And Translocation To Mitochondr ...  
 Arf6 Signaling Events  
 Estrogen Responsive Protein Efp Controls Cell Cycl ...  
 Syndecan-3-mediated Signaling Events  
 Urokinase-type Plasminogen Activator (uPA) And UPA ...  
 Btg Family Proteins And Cell Cycle Regulation  
 Regulation Of Transcriptional Activity By Pml  
 Mcalpain And Friends In Cell Motility  
 Cbl Mediated Ligand-induced Downregulation Of Egf ...  
 Signal Transduction By L1  
 Gab1 Signalosome  
 Sprouty Regulation Of Tyrosine Kinase Signals  
 Signaling Events Mediated By HDAC Class III  
 P53 Signaling Pathway  
 Overview Of Telomerase Protein Component Gene Hter ...  
 Signaling Mediated By P38-alpha And P38-beta  
 Regulation Of Telomerase  
 Activation Of BH3-only Proteins  
 ErbB Receptor Signaling Network  
 Posttranslational Regulation Of Adherens Junction ...  
 Hypoxic And Oxygen Homeostasis Regulation Of HIF-1  
 Factors Involved In Megakaryocyte Development And ...

*Prominently enriched in  
 BAC non Mucinous Type*

*Prominently enriched in  
 BAC Mucinous Type*

TCR Signaling In Naïve CD4+ T Cells  
 Class I PI3K Signaling Events  
 FCERI Mediated MAPK Activation  
 Regulation Of Nuclear Beta Catenin Signaling And T ...  
 PDGFR-beta Signaling Pathway  
 TCR Signaling In Naïve CD8+ T Cells  
 Cytokine Signaling In Immune System  
 EPHB Forward Signaling  
 Trk Receptor Signaling Mediated By PI3K And PLC-ga ...  
 IL2-mediated Signaling Events  
 Signaling By FGFR Mutants  
 Signaling By Interleukins  
 Plasma Membrane Estrogen Receptor Signaling  
 GMCSF-mediated Signaling Events  
 CXCR3-mediated Signaling Events  
 ErbB2/ErbB3 Signaling Events  
 Neurotrophic Factor-mediated Trk Receptor Signalin ...  
 Signalling To ERKs  
 MTOR Signaling Pathway  
 P38MAPK Events  
 Prolonged ERK Activation Events  
 Signaling By Leptin  
 Trk Receptor Signaling Mediated By The MAPK Pathwa ...  
 MEK Activation  
 RAF Activation  
 Downstream Signaling In Naïve CD8+ T Cells  
 Signalling To P38 Via RIT And RIN  
 C-MYB Transcription Factor Network  
 Activation Of RAS In B Cells  
 Ras Signaling In The CD4+ TCR Pathway

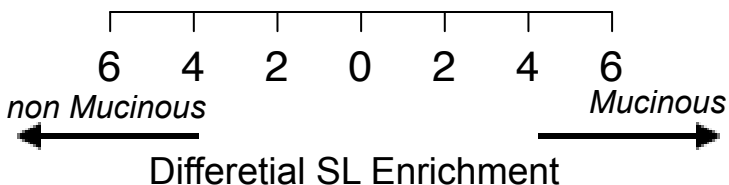

Supplement: Supplementary file [file 077701-4.pdf]
